# Supplementary material for: Exploring the Phenotypic Stability of Soybean Seed Compositions Using Multi-Trait Stability Index Approach
Source: MDPI journal article supplement (doi:10.3390/agronomy11112200), 2021-10-30
Supplement: s1 [file s1]

**Table S2 – Monthly average temperature (°C) and precipitation (mm) for the experimental sites in Hainan and Beijing in 2017 and 2018 and Anhui in 2017.**

| <b>Sanya, Hainan</b>       |         |       |          |      |          |       |           |       |          |       |          |       |
|----------------------------|---------|-------|----------|------|----------|-------|-----------|-------|----------|-------|----------|-------|
| Month                      | October |       | November |      | December |       | January   |       | February |       | March    |       |
| Year                       | 2017    | 2018  | 2017     | 2018 | 2017     | 2018  | 2017      | 2018  | 2017     | 2018  | 2017     | 2018  |
| Max. (°C)                  | 29      | 28    | 28       | 24   | 25       | 22    | 24        | 23    | 24       | 24    | 27       | 34    |
| Mean (°C)                  | 28      | 24    | 26       | 21   | 23       | 18    | 22        | 19    | 22       | 19    | 25       | 28    |
| Min. (°C)                  | 25      | 21    | 23       | 20   | 20       | 16    | 19        | 16    | 19       | 15    | 22       | 24    |
| Rainfall (mm)              | 262.7   | 95.4  | 79.3     | 79.8 | 21.8     | 18.6  | 40.1      | 16.2  | 33.6     | 16    | 124.9    | 22.3  |
| Sunshine (h)               | 166.5   | 202.5 | 136      | 90.5 | 132.5    | 155.5 | 131       | 124.5 | 138      | 173.5 | 200      | 245   |
| <b>Beijing</b>             |         |       |          |      |          |       |           |       |          |       |          |       |
| Month                      | June    |       | July     |      | August   |       | September |       | October  |       | November |       |
| Year                       | 2017    | 2018  | 2017     | 2018 | 2017     | 2018  | 2017      | 2018  | 2017     | 2018  | 2017     | 2018  |
| Max. (°C)                  | 30      | 33    | 37       | 33   | 36       | 32    | 32        | 26    | 20       | 21    | 11       | 14    |
| Mean (°C)                  | 28      | 28    | 35       | 29   | 34       | 28    | 29        | 21    | 18       | 19    | 9        | 11    |
| Min. (°C)                  | 23      | 22    | 31       | 25   | 30       | 24    | 24        | 17    | 15       | 15    | 6        | 8     |
| Rainfall (mm)              | 67      | 35.5  | 69.5     | 127  | 135.8    | 57.2  | 8.2       | 19    | 84.4     | 3.7   | 0        | 2.7   |
| Sunshine (h)               | 323.5   | 350.5 | 336      | 303  | 314      | 329   | 325       | 316   | 173.5    | 219   | 215      | 207.5 |
| <b>Hefei, Anhui (2017)</b> |         |       |          |      |          |       |           |       |          |       |          |       |
| Month                      | June    |       | July     |      | August   |       | September |       | October  |       |          |       |
| Max. (°C)                  | 30      |       | 36       |      | 33       |       | 27        |       | 20       |       |          |       |
| Mean (°C)                  | 28      |       | 34       |      | 31       |       | 25        |       | 19       |       |          |       |
| Min. (°C)                  | 24      |       | 31       |      | 28       |       | 22        |       | 16       |       |          |       |
| Rainfall (mm)              | 54      |       | 63.7     |      | 243      |       | 111       |       | 97.5     |       |          |       |
| Sunshine (h)               | 325     |       | 342.5    |      | 291.5    |       | 213.5     |       | 142.5    |       |          |       |
