# Supplementary material for: Exploring the Phenotypic Stability of Soybean Seed Compositions Using Multi-Trait Stability Index Approach
Source: MDPI journal article supplement (doi:10.3390/agronomy11112200), 2021-10-30
Supplement: s1 [file s1]

Table S3: Individual ANOVA for seven seed compositions of 135 soybean genotypes evaluated under five environments of Hainan and Beijing in 2017 and 2018 and Anhui in 2017.

| <b>Traits</b>         | <b>Environment</b> | <b>Mean</b> | <b>MSG</b> | <b>PFG</b> | <b>CV</b> | <b>h<sup>2</sup></b> |
|-----------------------|--------------------|-------------|------------|------------|-----------|----------------------|
| <b>Protein</b>        | Anhui 2017         | 40.3        | 43.3       | 1.26e-262  | 0.77      | 0.998                |
|                       | Beijing 2017       | 44.4        | 34.4       | 4.05e-252  | 0.68      | 0.997                |
|                       | Beijing 2018       | 44.9        | 45.5       | 1.01e-271  | 0.65      | 0.998                |
|                       | Hainan 2017        | 44.5        | 68.3       | 1.90e-295  | 0.66      | 0.999                |
|                       | Hainan 2018        | 46.2        | 35.8       | 9.07e-264  | 0.60      | 0.998                |
| <b>Oil</b>            | Anhui 2017         | 20.1        | 15.4       | 3.24E-211  | 1.44      | 0.995                |
|                       | Beijing 2017       | 19.4        | 13.3       | 1.87E-198  | 1.55      | 0.993                |
|                       | Beijing 2018       | 18.8        | 15.5       | 3.11E-205  | 1.63      | 0.994                |
|                       | Hainan 2017        | 20.3        | 15.5       | 3.32E-206  | 1.49      | 0.994                |
|                       | Hainan 2018        | 18.3        | 12.7       | 4.11E-205  | 1.51      | 0.994                |
| <b>Palmitic acid</b>  | Anhui 2017         | 13          | 2.34       | 2.57E-106  | 2.23      | 0.964                |
|                       | Beijing 2017       | 12.5        | 2          | 2.44E-100  | 2.26      | 0.960                |
|                       | Beijing 2018       | 12.4        | 2.48       | 5.95E-94   | 2.71      | 0.955                |
|                       | Hainan 2017        | 13.1        | 2.95       | 1.87E-117  | 2.24      | 0.971                |
|                       | Hainan 2018        | 13.5        | 2.01       | 2.80E-101  | 2.09      | 0.961                |
| <b>Stearic acid</b>   | Anhui 2017         | 4.53        | 0.781      | 1.97E-47   | 6.85      | 0.877                |
|                       | Beijing 2017       | 4.87        | 1.45       | 3.99E-79   | 6.13      | 0.939                |
|                       | Beijing 2018       | 5.22        | 1.4        | 3.51E-86   | 5.23      | 0.947                |
|                       | Hainan 2017        | 4.13        | 0.659      | 5.69E-42   | 7.39      | 0.859                |
|                       | Hainan 2018        | 4.72        | 0.823      | 3.57E-56   | 6.09      | 0.900                |
| <b>Oleic acid</b>     | Anhui 2017         | 21.2        | 25.8       | 8.30E-253  | 1.23      | 0.997                |
|                       | Beijing 2017       | 22.6        | 35.2       | 5.16E-260  | 1.26      | 0.998                |
|                       | Beijing 2018       | 22.9        | 52.9       | 8.54E-278  | 1.31      | 0.998                |
|                       | Hainan 2017        | 21.4        | 55.1       | 1.50E-292  | 1.26      | 0.999                |
|                       | Hainan 2018        | 22.7        | 43.7       | 1.50E-264  | 1.35      | 0.998                |
| <b>Linoleic acid</b>  | Anhui 2017         | 55.9        | 35.9       | 2.72E-263  | 0.50      | 0.998                |
|                       | Beijing 2017       | 54.6        | 31.9       | 2.72E-249  | 0.55      | 0.997                |
|                       | Beijing 2018       | 54.8        | 28         | 5.03E-250  | 0.51      | 0.997                |
|                       | Hainan 2017        | 57          | 51.5       | 4.01E-279  | 0.51      | 0.998                |
|                       | Hainan 2018        | 54.9        | 19.5       | 2.21E-226  | 0.52      | 0.996                |
| <b>Linolenic acid</b> | Anhui 2017         | 7.66        | 3.24       | 1.30E-96   | 3.81      | 0.974                |
|                       | Beijing 2017       | 9.18        | 5.82       | 1.28E-97   | 3.44      | 0.983                |
|                       | Beijing 2018       | 8.92        | 7.33       | 4.09E-111  | 3.65      | 0.986                |
|                       | Hainan 2017        | 8.33        | 5.12       | 2.85E-113  | 3.46      | 0.984                |
|                       | Hainan 2018        | 9.72        | 5.86       | 5.99E-102  | 2.92      | 0.986                |

**MSG**, mean square of genotype; **PFG**, P-values for genotype; **CV**, coefficient of variation (%) ; **h<sup>2</sup>**, broad-sense heritability.
